# Supplementary figures and images for: Improved shellac mediated nanoscale application drug release effect in a gastric-site drug delivery system
Source: Royal Society of Chemistry journal article supplement (doi:10.1039/c7ra10757a), 2017-01-01

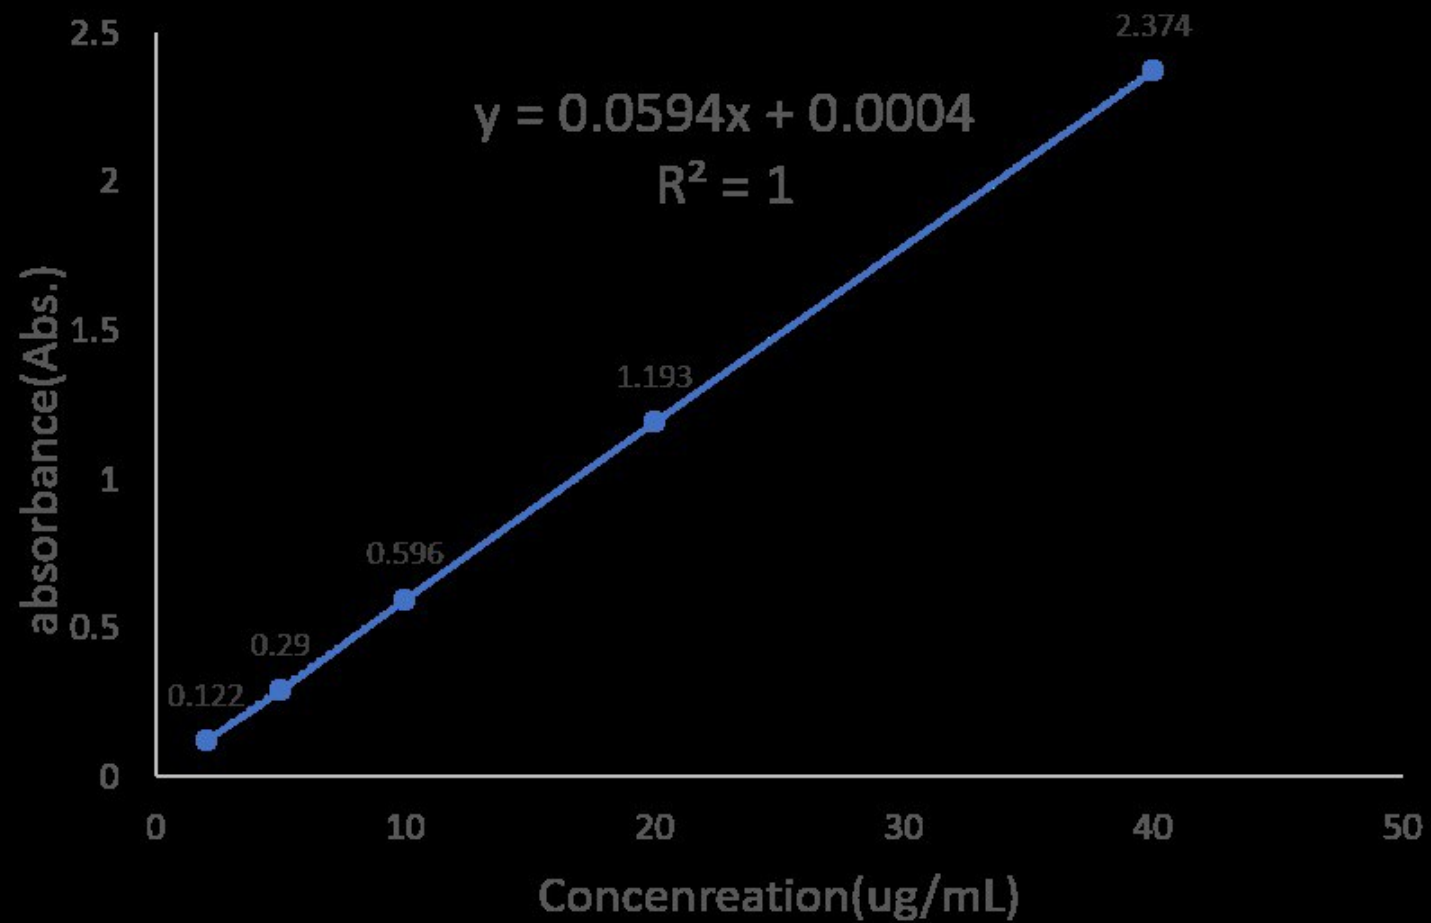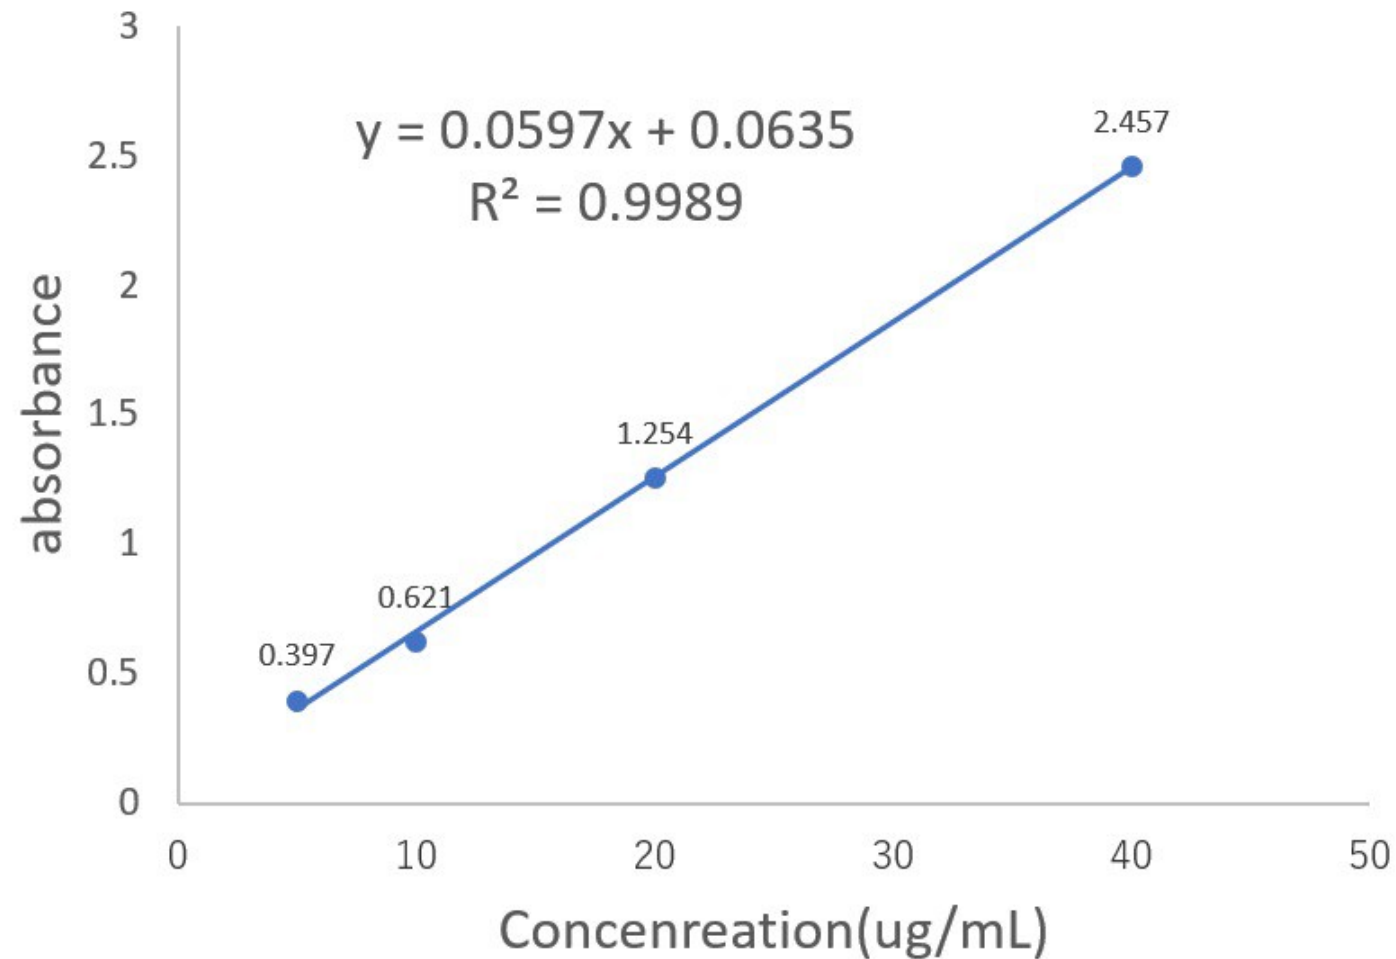

Supplement: c7ra10757a1.pdf [file c7ra10757a1.pdf]
